# Supplementary material for: Synthesis and crystal structure of two new heterometallic thioantimonates(III) [Ni(pda)2]CuI4SbIII2S6and [Ni(dien)2]CuISbIII3S6,
Source: Royal Society of Chemistry journal article supplement (doi:10.1039/b906640c), 2009-08-29
Supplement: b906640c.pdf [file b906640c.pdf]

### Supporting Information

Table S1. Selected distances(Å) and angles(°) for [Ni(pda)<sub>2</sub>]Cu<sub>4</sub>Sb<sub>2</sub>S<sub>6</sub> (**1**) and [Ni(dien)<sub>2</sub>]CuSb<sub>3</sub>S<sub>6</sub> (**2**)

| <b>1</b>     |            |                     |            |
|--------------|------------|---------------------|------------|
| Sb(1)-S(1)#1 | 2.435(4)   | S(1)#1-Sb(1)-S(3)   | 99.48(13)  |
| Sb(1)-S(3)   | 2.436(4)   | S(1)#1-Sb(1)-S(2)#2 | 99.68(13)  |
| Sb(1)-S(2)#2 | 2.438(4)   | S(3)-Sb(1)-S(2)#2   | 101.10(14) |
| Cu(1)-S(2)   | 2.262(4)   | S(2)-Cu(1)-S(1)     | 124.98(15) |
| Cu(1)-S(1)   | 2.262(4)   | S(2)-Cu(1)-S(3)     | 120.21(15) |
| Cu(1)-S(3)   | 2.274(4)   | S(1)-Cu(1)-S(3)     | 113.00(15) |
| Cu(2)-S(3)   | 2.255(4)   | S(3)-Cu(2)-S(2)#1   | 127.36(16) |
| Cu(2)-S(2)#1 | 2.273(4)   | S(3)-Cu(2)-S(1)#3   | 117.83(16) |
| Cu(2)-S(1)#3 | 2.278(4)   | S(2)#1-Cu(2)-S(1)#3 | 114.49(15) |
| Ni(1)-N(1)   | 2.077(11)  | N(1)#4-Ni(1)-N(1)   | 180        |
| Ni(1)-N(2)   | 2.079(11)  | N(2)-Ni(1)-N(2)#4   | 180        |
| Ni(1)-S(1)   | 2.633(4)   | S(1)-Ni(1)-S(1)#4   | 180        |
| <b>2</b>     |            |                     |            |
| Sb(1)-S(2)   | 2.3788(11) | Ni(1)-N(3)          | 2.138(4)   |
| Sb(1)-S(3)   | 2.4672(12) | Ni(1)-N(2)          | 2.146(4)   |
| Sb(1)-S(1)   | 2.4767(13) | S(2)-Sb(1)-S(3)     | 100.65(4)  |
| Sb(2)-S(5)   | 2.3522(11) | S(2)-Sb(1)-S(1)     | 101.61(5)  |
| Sb(2)-S(3)   | 2.4607(12) | S(3)-Sb(1)-S(1)     | 86.57(4)   |
| Sb(2)-S(4)   | 2.4727(12) | S(5)-Sb(2)-S(3)     | 99.82(4)   |
| Sb(3)-S(6)   | 2.3565(12) | S(5)-Sb(2)-S(4)     | 97.85(4)   |
| Sb(3)-S(1)#1 | 2.4513(14) | S(3)-Sb(2)-S(4)     | 95.19(4)   |
| Sb(3)-S(4)#2 | 2.4661(11) | S(6)-Sb(3)-S(1)#1   | 101.42(5)  |
| Sb(3)-Cu(1)  | 3.0873(9)  | S(6)-Sb(3)-S(4)#2   | 101.01(4)  |
| Cu(1)-S(2)#1 | 2.2531(13) | S(1)#1-Sb(3)-S(4)#2 | 94.55(4)   |
| Cu(1)-S(5)   | 2.2553(12) | N(1)-Ni(1)-N(1)#3   | 180        |
| Cu(1)-S(6)   | 2.3137(13) | N(3)#3-Ni(1)-N(3)   | 180        |
| Ni(1)-N(1)   | 2.087(3)   | N(2)-Ni(1)-N(2)#3   | 180        |
| Ni(1)-N(3)#3 | 2.138(4)   |                     |            |

Symmetry codes for **1**: #1=x-1,y,z; #2=x-1/2,-y+3/2,z-1/2; #3=x-1/2,-y+3/2,z+1/2 #4=-x+1,-y+1,-z+1; for **2**: #1=x,-y+1/2,z-1/2; #2=x,y+1,z; #3=-x,-y+1,-z+1.

Table S2. Proposed hydrogen bonding geometry for [Ni(pda)<sub>2</sub>]Cu<sub>4</sub>Sb<sub>2</sub>S<sub>6</sub> (**1**) and  
[Ni(dien)<sub>2</sub>]CuSb<sub>3</sub>S<sub>6</sub> (**2**)

| D-H      | A  | d(H···A) | d(D···A)  | <DHA | Symmetry code      |
|----------|----|----------|-----------|------|--------------------|
| <b>1</b> |    |          |           |      |                    |
| N1-H1A   | S3 | 2.60     | 3.428(12) | 153  | x+1,y,z            |
| N1-H1B   | S2 | 2.64     | 3.524(12) | 169  | x+1/2,-y+1/2,z+1/2 |
| N2-H2A   | S3 | 2.69     | 3.586(13) | 176  | x+1/2,-y+1/2,z-1/2 |
| N2-H2B   | S2 | 2.60     | 3.476(12) | 164  | -x+1,-y+1,-z+1     |
| <b>2</b> |    |          |           |      |                    |
| N1-H1C   | S6 | 2.60     | 3.457(4)  | 157  |                    |
| N2-H2B   | S6 | 2.70     | 3.506(4)  | 149  |                    |
| N5-H5C   | S2 | 2.56     | 3.430(4)  | 161  | -x,-y+1,-z+1       |
